# Supplementary material for: Immune Signatures in Patients with Psoriasis Vulgaris of Blood‐Heat Syndrome: A Systematic Review and Meta‐Analysis
Source: Hindawi journal article supplement (doi:10.1155/2016/9503652), 2016-01-01

## MOOSE Checklist

### **Immune signatures in patients with psoriasis vulgaris of blood-heat syndrome: a systematic review and meta-analysis**

Xin Li<sup>1,2</sup>, Qing-qing Xiao<sup>1,2</sup>, Fu-lun Li<sup>1,2</sup>, Rong Xu<sup>1,2</sup>, Bin Fan<sup>1,2</sup>, Min-feng Wu<sup>1,2</sup>, Min Zhou<sup>1,2</sup>, Su Li<sup>1,2</sup>, Jie Chen<sup>1,2</sup>, Shi-guang Peng<sup>3\*</sup>, Bin Li<sup>1,2\*</sup>

1. Department of Dermatology, Yueyang Hospital of Integrated Traditional Chinese and Western Medicine, Shanghai University of Traditional Chinese Medicine, Shanghai, China, 200437
2. Institute of Dermatology, Shanghai Academy of Traditional Chinese Medicine, shanghai, China, 201203
3. Department of Dermatology, Beijing Chao-yang Hospital, Capital Medical University, Beijing, China, 100020

\* Corresponding author:

Shi-guang Peng: 18501367719@163.com or Bin Li: 18930568129@163.com

| <b>Criteria</b>                                    |                                       | <b>Brief description of how the criteria were handled in the meta-analysis</b>                                                                                                                                                                                                                           |
|----------------------------------------------------|---------------------------------------|----------------------------------------------------------------------------------------------------------------------------------------------------------------------------------------------------------------------------------------------------------------------------------------------------------|
| <b>Reporting of background should include</b>      |                                       |                                                                                                                                                                                                                                                                                                          |
| √                                                  | Problem definition                    | Page 3: Psoriasis is a common, chronic, relapsing immune-mediated inflammatory disease. Psoriasis prevalence is on the rise, while studies investigating systemic immunity in patients with psoriasis vulgaris of blood-heat syndrome have used different serum markers and reported discrepant results. |
| √                                                  | Hypothesis statement                  | Page 4: The immunological serum markers IFN- $\gamma$ , IL-17, IL-23, TNF- $\alpha$ are elevated and IL-4, IL-10 are decreased in patients with psoriasis vulgaris of blood-heat syndrome compared with healthy controls.                                                                                |
| √                                                  | Description of study outcomes         | Page 4: IFN- $\gamma$ , IL-4, IL-17, IL-23, IL-6, TNF- $\alpha$ , and IL-10                                                                                                                                                                                                                              |
| √                                                  | Type of exposure or intervention used | Page 4: psoriasis vulgaris of blood-heat syndrome                                                                                                                                                                                                                                                        |
| √                                                  | Type of study designs used            | Page 5: There were no limitations on the study design.                                                                                                                                                                                                                                                   |
| √                                                  | Study population                      | Page 5: We placed no restriction.                                                                                                                                                                                                                                                                        |
| <b>Reporting of search strategy should include</b> |                                       |                                                                                                                                                                                                                                                                                                          |
| √                                                  | Qualifications of searchers           | Page 5: The credentials of the three investigators X.L.,                                                                                                                                                                                                                                                 |

|   |                                                                               |                                                                                                                                                                                                                                                                                               |
|---|-------------------------------------------------------------------------------|-----------------------------------------------------------------------------------------------------------------------------------------------------------------------------------------------------------------------------------------------------------------------------------------------|
|   |                                                                               | Q.Q.X, and F.L.L. are indicated in the author list.                                                                                                                                                                                                                                           |
| √ | Search strategy, including time period included in the synthesis and keywords | Page 5: Time period: from January 1980 to May 2015.<br>Keywords: psoriasis, blood-heat syndrome, IFN- $\gamma$ , IL-4, IL-17, IL-23, IL-6, TNF- $\alpha$ , and IL-10.                                                                                                                         |
| √ | Databases and registries searched                                             | Page 5: MEDLINE, Embase, Cochrane Central Register of Controlled Trials, China National Knowledge Infrastructure database (CNKI), Chinese Scientific Journals Full-Text Database (CQVIP), Wanfang Data Knowledge Service Platform, and Chinese Biomedical Literature Service System (SinoMed) |
| √ | Search software used, name and version, including special features            | Page 5: We did not employ a search software. EndNote was used to merge retrieved citations and eliminate duplications.                                                                                                                                                                        |
| √ | Use of hand searching                                                         | Pages 5-6: We hand-searched bibliographies of retrieved papers for additional references.                                                                                                                                                                                                     |
| √ | List of citations located and those excluded, including justifications        | Pages 5-6: Details of the literature search process are outlined in the flow chart. The citation list is available upon request.                                                                                                                                                              |
| √ | Method of addressing articles published in languages other than English       | Page 5: We limited to the studies published in English or Chinese.                                                                                                                                                                                                                            |
| √ | Method of handling abstracts and unpublished studies                          | Page 6: We have contacted authors for abstracts and unpublished studies.                                                                                                                                                                                                                      |

|                                            |                                                                                                                                            |                                                                                                                                                                                                                                                 |
|--------------------------------------------|--------------------------------------------------------------------------------------------------------------------------------------------|-------------------------------------------------------------------------------------------------------------------------------------------------------------------------------------------------------------------------------------------------|
| √                                          | Description of any contact with authors                                                                                                    | Page 6: We have contacted with J. Liu and J.W. Li for their full texts, as adequate information for the performance of this review was unavailable from abstracts.                                                                              |
| <b>Reporting of methods should include</b> |                                                                                                                                            |                                                                                                                                                                                                                                                 |
| √                                          | Description of relevance or appropriateness of studies assembled for assessing the hypothesis to be tested                                 | Pages 5-6: Detailed inclusion and exclusion criteria were described in the study selection section.                                                                                                                                             |
| √                                          | Rationale for the selection and coding of data                                                                                             | Page 6: Data extracted from each of the studies were relevant to the first author, study characteristics, characteristics of participants, outcome characteristics.                                                                             |
| √                                          | Assessment of confounding                                                                                                                  | Not applicable.                                                                                                                                                                                                                                 |
| √                                          | Assessment of study quality, including blinding of quality assessors; stratification or regression on possible predictors of study results | Page 6: The Newcastle-Ottawa Scale was used to assess the study quality, by categorizing it into three dimensions: selection, comparability and exposure for case-control studies; and selection, comparability and outcome for cohort studies. |
| √                                          | Assessment of heterogeneity                                                                                                                | Pages 6-7: Heterogeneity of the studies were explored within two types of study designs using $I^2$ test that provides the relative amount of variance of the summary effect due to the between-study heterogeneity.                            |

|                                               |                                                                          |                                                                                                                                                                               |
|-----------------------------------------------|--------------------------------------------------------------------------|-------------------------------------------------------------------------------------------------------------------------------------------------------------------------------|
| √                                             | Description of statistical methods in sufficient detail to be replicated | Pages 6-7: Description of methods of meta-analyses was detailed in the data synthesis and analysis section.                                                                   |
| √                                             | Provision of appropriate tables and graphics                             | We included 1 flow chart, 1 summary tables and 4 figures.                                                                                                                     |
| <b>Reporting of results should include</b>    |                                                                          |                                                                                                                                                                               |
| √                                             | Graph summarizing individual study estimates and overall estimate        | Figure 3                                                                                                                                                                      |
| √                                             | Table giving descriptive information for each study included             | Table 1                                                                                                                                                                       |
| √                                             | Results of sensitivity testing                                           | Not applicable.                                                                                                                                                               |
| √                                             | Indication of statistical uncertainty of findings                        | Pages 8-9: 95% confidence intervals were presented with all summary estimates.                                                                                                |
| <b>Reporting of discussion should include</b> |                                                                          |                                                                                                                                                                               |
| √                                             | Quantitative assessment of bias                                          | Assessed using funnel plots (see below)                                                                                                                                       |
| √                                             | Justification for exclusion                                              | Pages 10-11: Papers were excluded on the basis of exclusion criteria listed. We did not systematically exclude any studies on the basis of language or study population size. |

|                                                |                                                                |                                                                                                                                                                                                                                                                                                                                                                                                                                          |
|------------------------------------------------|----------------------------------------------------------------|------------------------------------------------------------------------------------------------------------------------------------------------------------------------------------------------------------------------------------------------------------------------------------------------------------------------------------------------------------------------------------------------------------------------------------------|
| √                                              | Assessment of quality of included studies                      | The Newcastle-Ottawa Scale was used to assess the study quality. Details are outlined in Table 1.                                                                                                                                                                                                                                                                                                                                        |
| <b>Reporting of conclusions should include</b> |                                                                |                                                                                                                                                                                                                                                                                                                                                                                                                                          |
| √                                              | Consideration of alternative explanations for observed results | Page 11: We discussed the limitations of this study. We were unable to measure the progression of psoriasis vulgaris of blood-heat syndrome using serum markers in pretherapeutic patients, and only three/four eligible observation studies that reported serum IL-23/IL-6 levels were reviewed. We noted that more high-quality studies, with a low risk of bias and adequate sample sizes, are required to fully clarify the effects. |
| √                                              | Generalization of the conclusions                              | Page 12: Patients with psoriasis vulgaris of blood-heat syndrome show significantly elevated levels of IFN- $\gamma$ , IL-17, IL-23, and TNF- $\alpha$ and decreased levels of IL-4 and IL-10.                                                                                                                                                                                                                                           |
| √                                              | Guidelines for future research                                 | Page 11: We recommend future studies on the effect of clearing heat and cooling blood therapy on markers of immunology.                                                                                                                                                                                                                                                                                                                  |
| √                                              | Disclosure of funding source                                   | Page 16: Description of the detail in the acknowledgments section.                                                                                                                                                                                                                                                                                                                                                                       |

**Supplementary Figures 1 a to g. Funnel plots identifying publication bias for all studied outcomes (Funnel plot of MD for included studies).**

**a. IFN- $\gamma$**

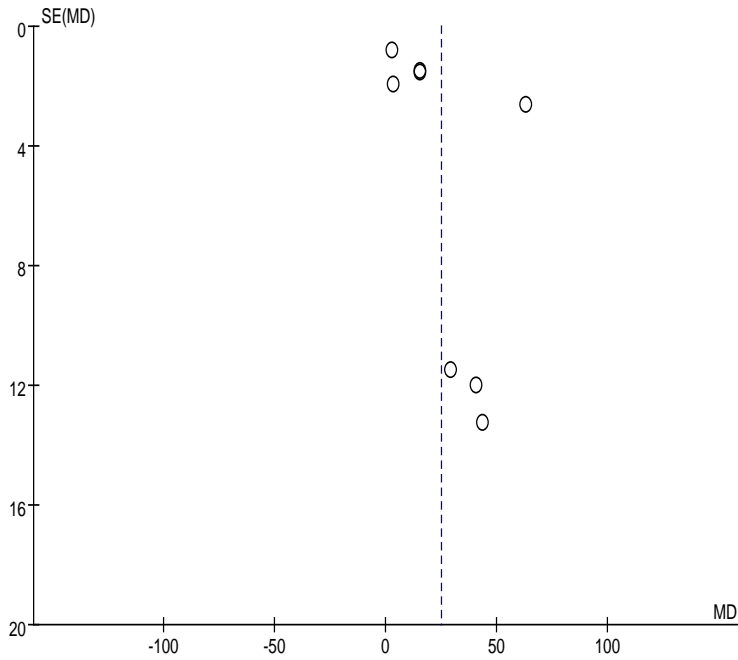

**b. IL-4**

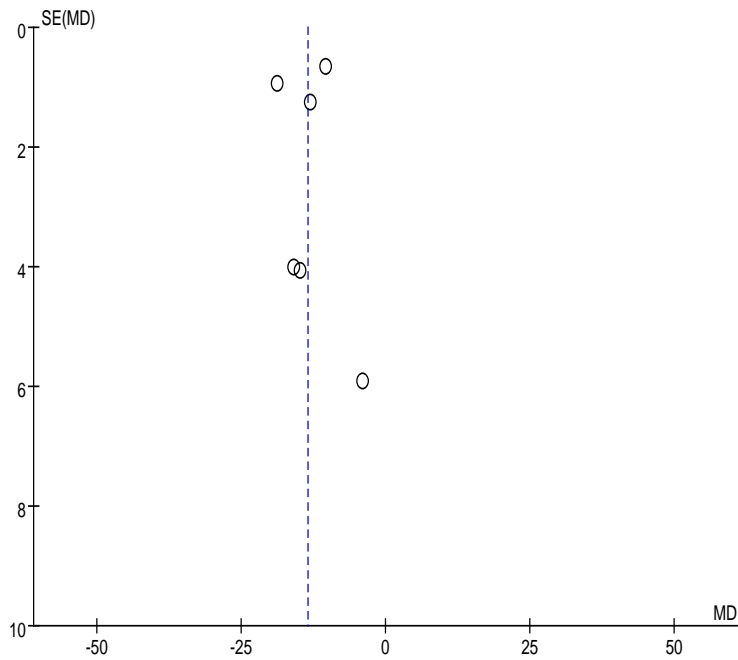

**c. IL-17**

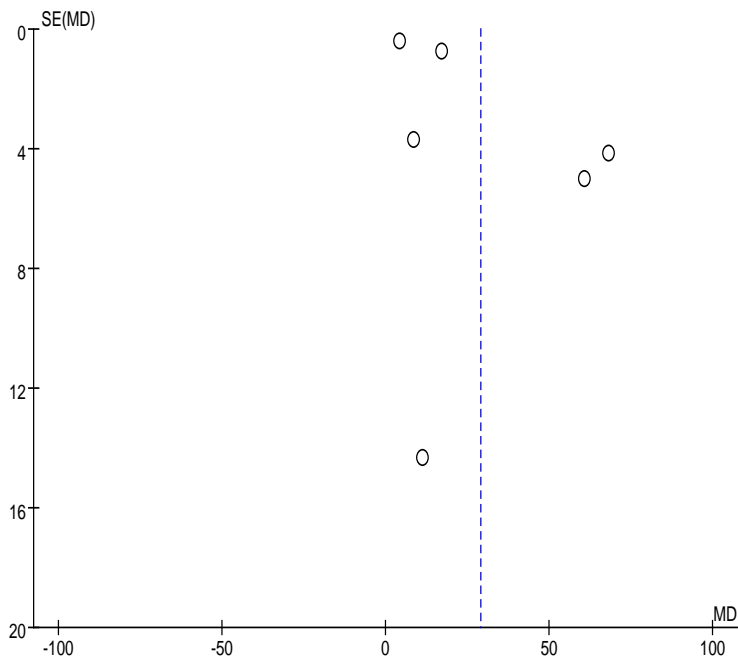

**d. IL-23**

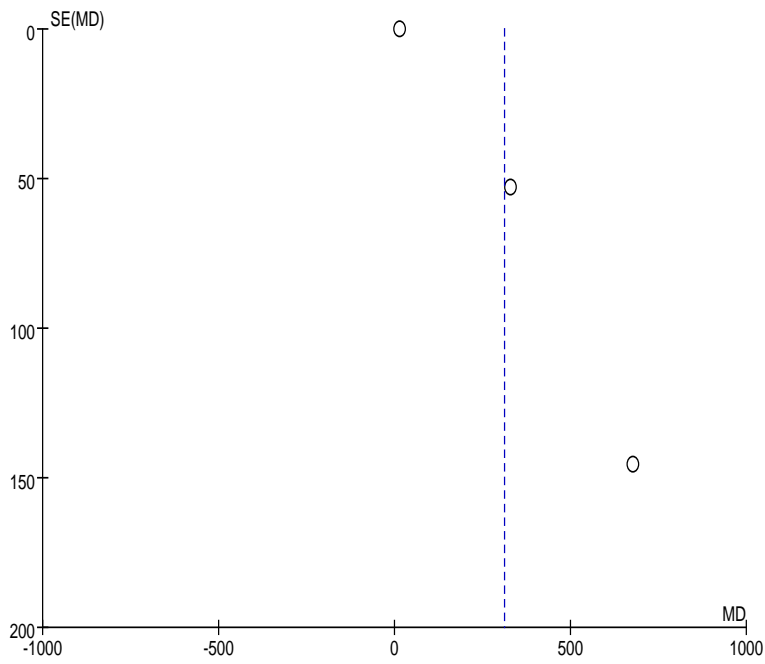



**e. IL-6**

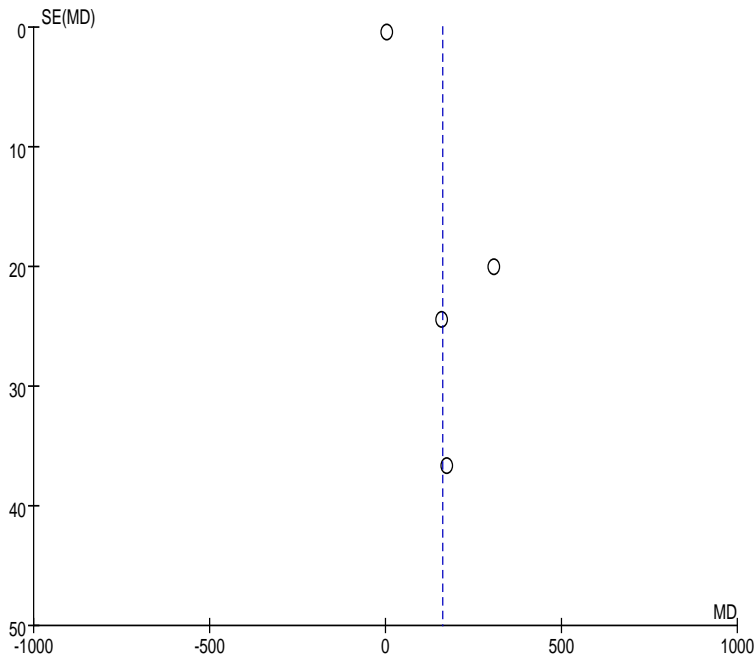

**f. TNF- $\alpha$**

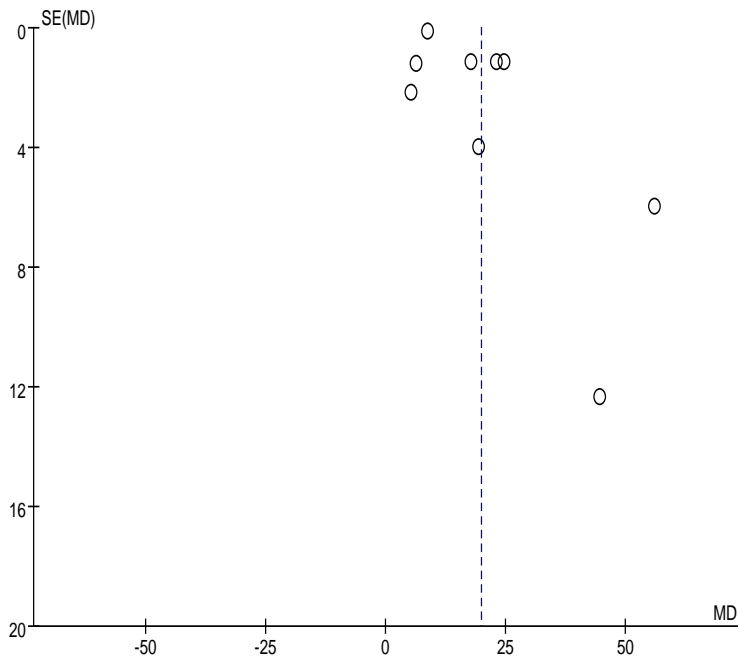

**g. IL-10**

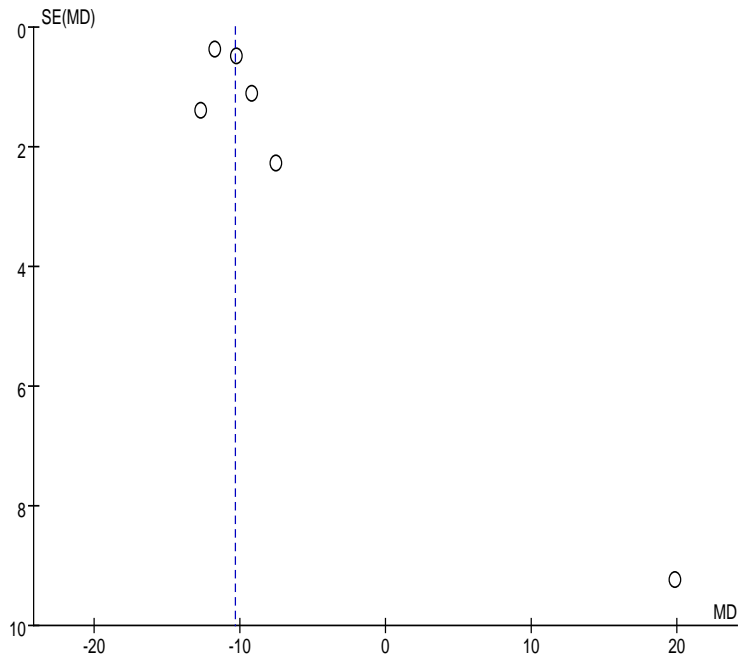

Supplement: f1 [file 9503652.f1.pdf]
